# Supplementary material for: Comparison of normalization methods for Illumina BeadChip HumanHT-12 v3
Source: Springer Nature journal article supplement (doi:10.1186/1471-2164-11-349), 2010-06-02

**bg\_rma\_log\_quantile (-2)**

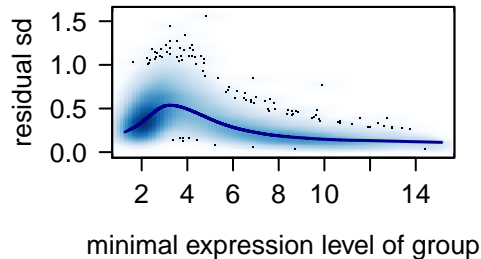

**noBg\_cubicSpline (0)**

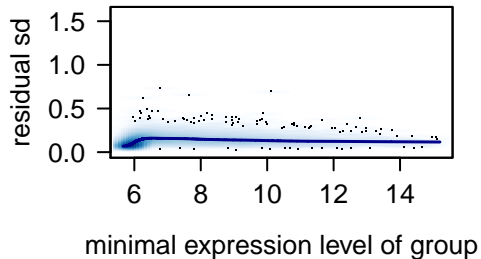

**noBg\_vst\_rsn (2)**

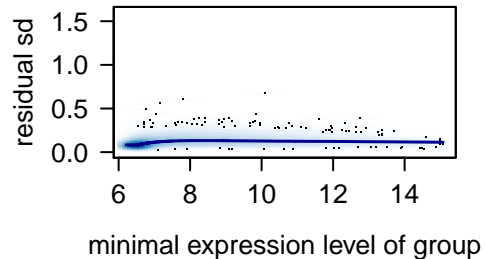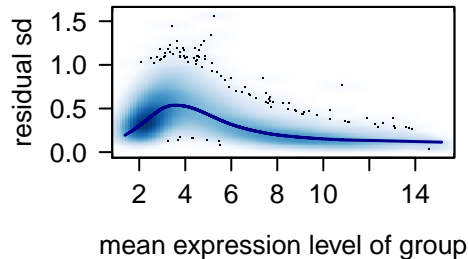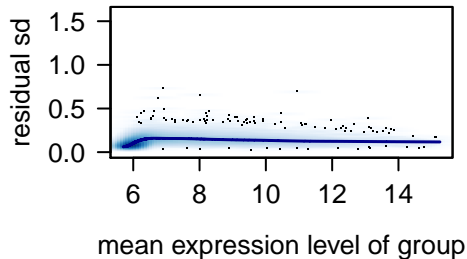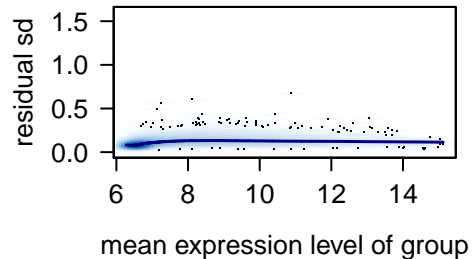

Supplement: 12864_2010_2943_MOESM16_ESM.pdf [file 12864_2010_2943_MOESM16_ESM.pdf]
